# Supplementary material
Source: PubMed Central journal article supplement (PMC11361514)
Supplement: sj-pdf-1-jps-10.1177_24755303231179373.pdf [file sj-pdf-1-jps-10.1177_24755303231179373.pdf]

## Consolidated criteria for reporting qualitative research

### **Domain 1:** Research team and reflexivity

#### Personal Characteristics

1. Interviewer/facilitator- Authors 1-3 conducted interviews
2. Credentials
  1. Mohammed Moumen, BSPH
  2. Mallory L. Zaino, MD
  3. Katherine R. Salisbury, BS
  4. Rita O. Pichardo, MD
  5. Steven R. Feldman, MD, PhD
3. Occupation
  1. Mohammed Moumen – Medical student
  2. Mallory L. Zaino MD – Dermatology research fellow
  3. Katherine R. Salisbury – Medical student
  4. Rita O. Pichardo MD – Clinical dermatologists
  5. Steven R. Feldman MD, PhD – Clinical dermatologists
4. Gender
  1. Mohammed Moumen – Male
  2. Mallory L. Zaino MD – Female
  3. Katherine R. Salisbury – Female
  4. Rita O. Pichardo MD – Female
  5. Steven R. Feldman MD, PhD – Male
5. Experience and training
  1. Mohammed Moumen – former interview training by Wake Forest Baptist Hospital research team. Mohammed has also published a qualitative project in the Teaching and Learning in Medicine Journal.

#### Relationship with participants

6. Relationship established – none
7. Participant knowledge of the interviewer – Participants were made aware of the researchers' full names and levels in training as well as the aim of study.
8. Interviewer characteristics – MM and KS are full-time medical students, MZ has completed one year of internal medicine residency and now performs clinical research, RP and SF are full-time clinical dermatologists.

### **Domain 2:** Study design

#### Theoretical framework

9. Thematic analysis was utilized.

#### Participant selection

10. Convenience sampling was utilized. Patients who came to the clinic for psoriasis were recruited to participate.
11. Face to face.

12. 28 participants.
13. 11 patients refused to participate in the study.

#### Setting

14. Dermatology outpatient clinic.
15. The researcher and the participant were the only people present during the interviews.
16. Patients 18 years of age or older with a diagnosis of psoriasis.

#### Data collection

17. A total of 14 questions were provided by the researcher to guide the interviews (Appendix1)
18. No repeat interviews were carried out.
19. Audio recording was accomplished using Microsoft Teams software.
20. No field notes were made.
21. Interviews lasted between 15-20 minutes.
22. Data saturation has been discussed and addressed. The literature suggests that saturation can be achieved by as little as 6 interviews<sup>1</sup>. At 14 interviews we realized that our themes were not changing and there were no new themes that emerged. We have then doubled this number to 28 with an overall consistency in themes. We believe that our data is saturated. (<sup>1</sup>Guest, G., Bunce, A., & Johnson, L. (2006). How Many Interviews Are Enough?: An Experiment with Data Saturation and Variability. *Field Methods*, 18(1), 59–82. <https://doi-org.wake.idm.oclc.org/10.1177/1525822X05279903>)
23. Transcripts were not returned to participants.

### **Domain 3: Analysis and findings**

#### Data analysis

24. Authors A+ B coded the data.
25. A codebook was created after reviewing the first 3 transcripts, this codebook continued to be modified as new themes arose in the subsequent transcripts.
26. Themes were derived from the data.
27. The codebook was created using excel.
28. Participants did not provide feedback on the findings.

#### Reporting

29. A participant quotation is included and identified by the participant number under each subtheme.
30. Our data (presented in results and table 1+2) and findings (discussed in the discussion) are congruent.
31. Major themes are discussed in the result and discussion sections.
32. Minor themes are included in Table 2.
